# Supplementary material
Source: PubMed Central journal article supplement (PMC7448383)
Supplement: NIHMS1611412-supplement-Taylor_table_s2.pdf [file NIHMS1611412-supplement-Taylor_table_s2.pdf]

**Table S2, Related to Figures 1, 5, S1, and S5.**

|          | WT  | G3BP1 KO | G3BP2 KO | Caprin-1 KO | PRRC2C KO | TIA1 KO | USP10 KO | UBAP2L KO | HDAC6 KO | G3BP dKO | G3BP dKO + GFP-G3BP1 | G3BP dKO +GFP-G3BP2 | G3BP dKO +GST-G3BP1 | G3BP dKO +FKBP-G3BP1 |
|----------|-----|----------|----------|-------------|-----------|---------|----------|-----------|----------|----------|----------------------|---------------------|---------------------|----------------------|
| G3BP1    | Yes |          | Yes      | Yes         | Yes       | Yes     | Yes      | Yes       | Yes      |          |                      |                     |                     |                      |
| G3BP2    | Yes | Yes      |          | Yes         | Yes       | Yes     | Yes      | Yes       | Yes      |          |                      |                     |                     |                      |
| Caprin-1 | Yes | Yes      | Yes      |             | Yes       | Yes     | Yes      | Yes       | Yes      | No       | Yes                  | Yes                 | Yes                 | Yes                  |
| PRRC2C   | Yes | Yes      | Yes      | Yes         |           | Yes     | Yes      | Yes       | Yes      | No       | Yes                  | Yes                 | Yes                 | Yes                  |
| TIA1     | Yes | Yes      | Yes      | Yes         | Yes       |         | Yes      | Yes       | Yes      | No       | Yes                  | Yes                 | Yes                 | Yes                  |
| USP10    | Yes | Yes      | Yes      | Yes         | Yes       | Yes     | Yes      | Yes       | Yes      | No       | Yes                  | Yes                 | Yes                 | Yes                  |
| ATXN2    | Yes | Yes      | Yes      | Yes         | Yes       | Yes     | Yes      | Yes       | Yes      | No       | Yes                  | Yes                 | Yes                 | Yes                  |
| CSDE1    | Yes | Yes      | Yes      | Yes         | Yes       | Yes     | Yes      | Yes       | Yes      | No       | Yes                  | Yes                 | Yes                 | Yes                  |
| TAF15    | Yes | Yes      | Yes      | Yes         | Yes       | Yes     | Yes      | Yes       | Yes      | No       | Yes                  | Yes                 | Yes                 | Yes                  |
| PABP     | Yes | Yes      | Yes      | Yes         | Yes       | Yes     | Yes      | Yes       | Yes      | No       | Yes                  | Yes                 | Yes                 | Yes                  |
| TRIM25   | Yes | Yes      | Yes      | Yes         | Yes       | Yes     | Yes      | Yes       | Yes      | No       | Yes                  | Yes                 | Yes                 | Yes                  |
| eIF3B    | Yes | Yes      | Yes      | Yes         | Yes       | Yes     | Yes      | Yes       | Yes      | No       | Yes                  | Yes                 | Yes                 | Yes                  |
| YB1      | Yes | Yes      | Yes      | Yes         | Yes       | Yes     | Yes      | Yes       | Yes      | No       | Yes                  | Yes                 | Yes                 | Yes                  |
| YTHDF1   | Yes | Yes      | Yes      | Yes         | Yes       | Yes     | Yes      | Yes       | Yes      | No       | Yes                  | Yes                 | Yes                 | Yes                  |
| YTHDF2   | Yes | Yes      | Yes      | Yes         | Yes       | Yes     | Yes      | Yes       | Yes      | No       | Yes                  | Yes                 | Yes                 | Yes                  |
| YTHDF3   | Yes | Yes      | Yes      | Yes         | Yes       | Yes     | Yes      | Yes       | Yes      | No       | Yes                  | Yes                 | Yes                 | Yes                  |
| PolyA    | Yes | Yes      | Yes      | Yes         | Yes       | Yes     | Yes      | Yes       | Yes      | No       | Yes                  | Yes                 | Yes                 | Yes                  |
