# Supplementary material
Source: PubMed Central journal article supplement (PMC7448383)

# Figure S1

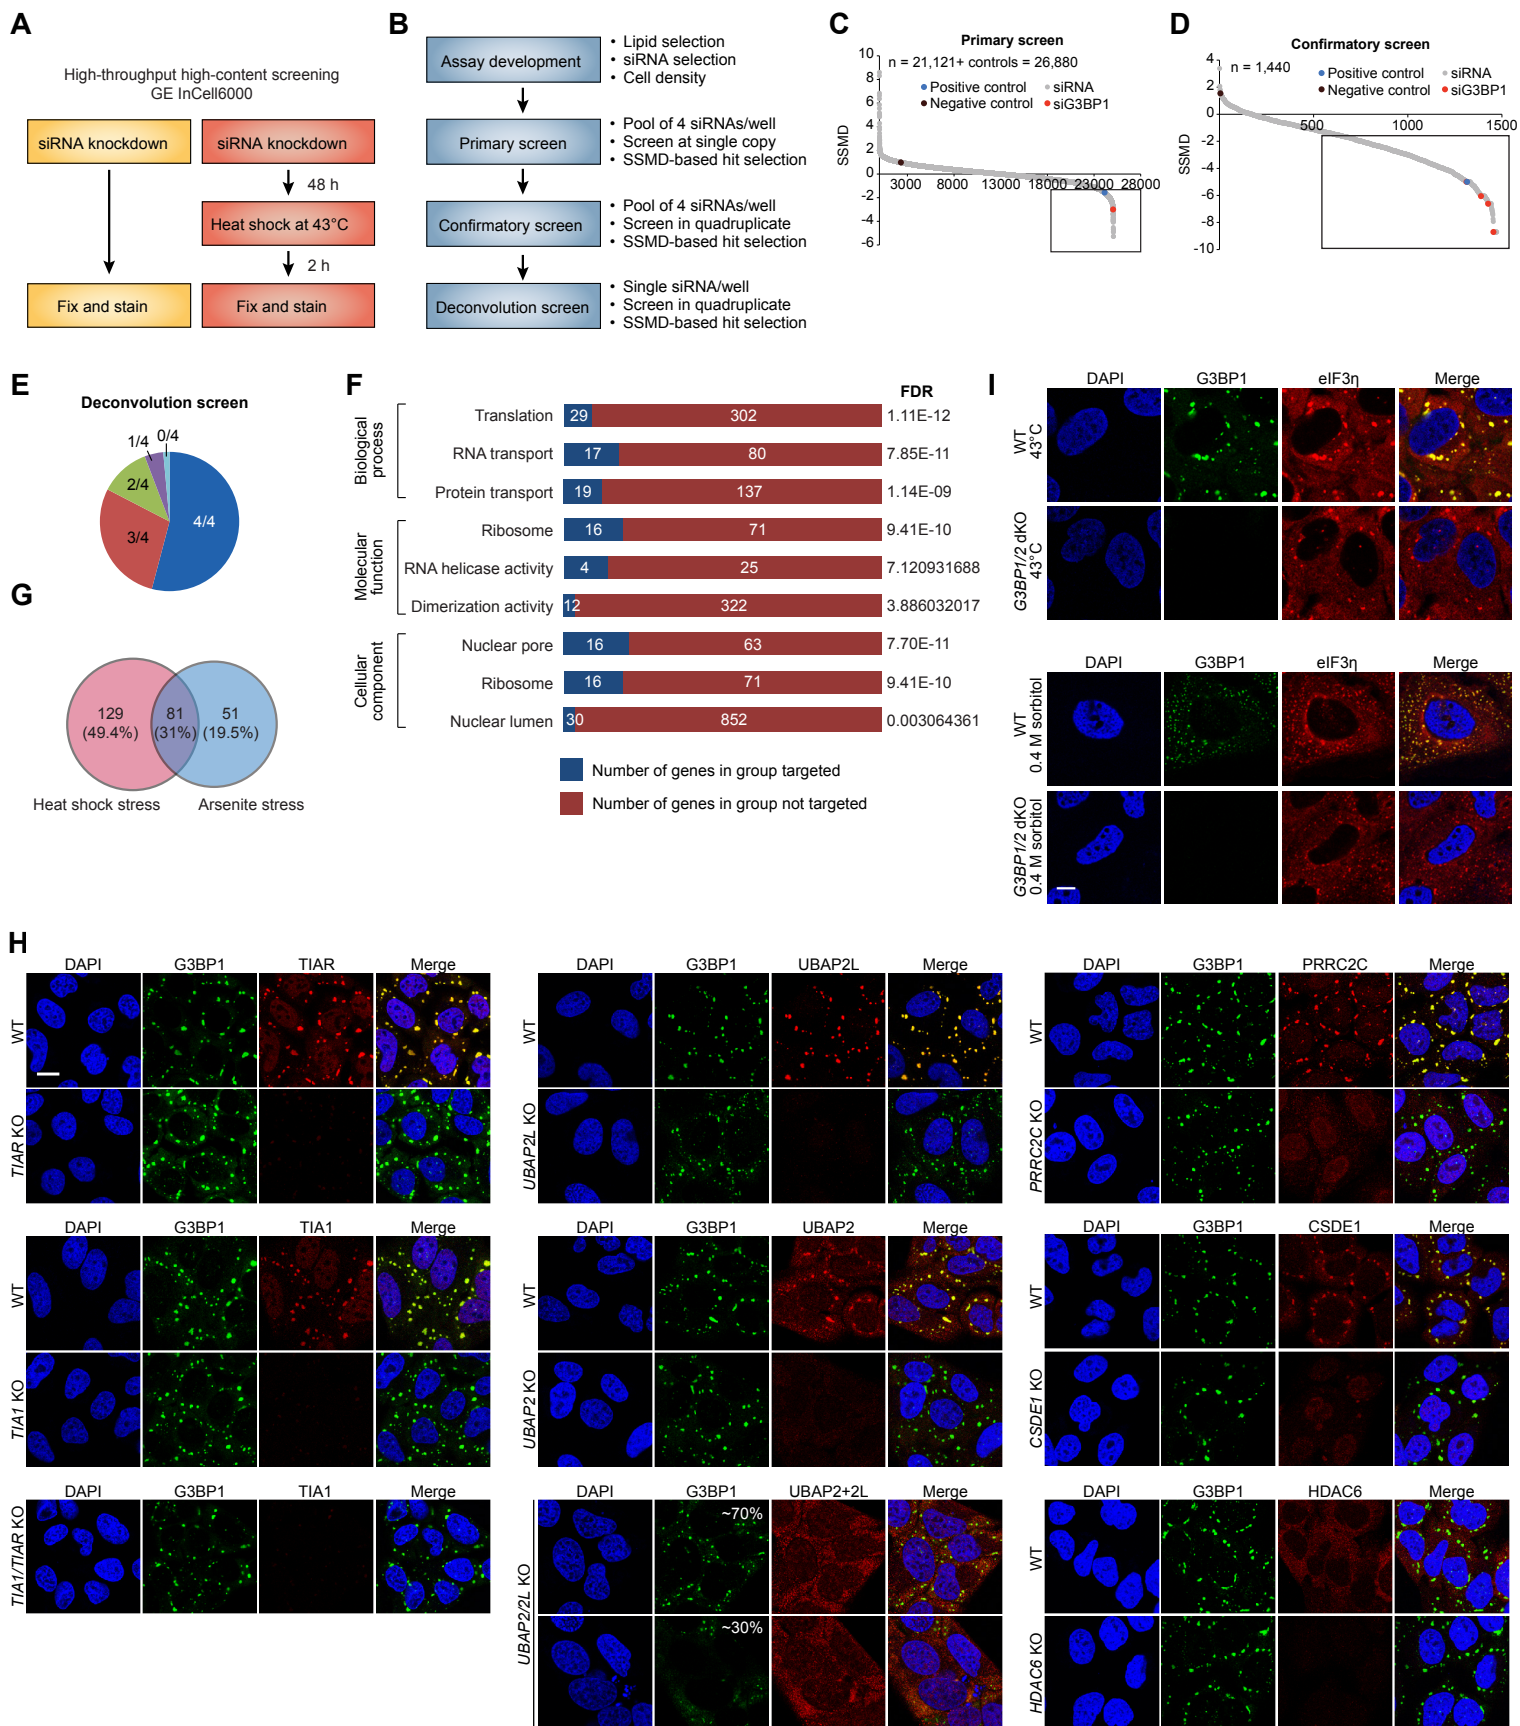

Supplement: NIHMS1611412-supplement-Taylor_figure_S1.pdf [file NIHMS1611412-supplement-Taylor_figure_S1.pdf]

# Figure S3

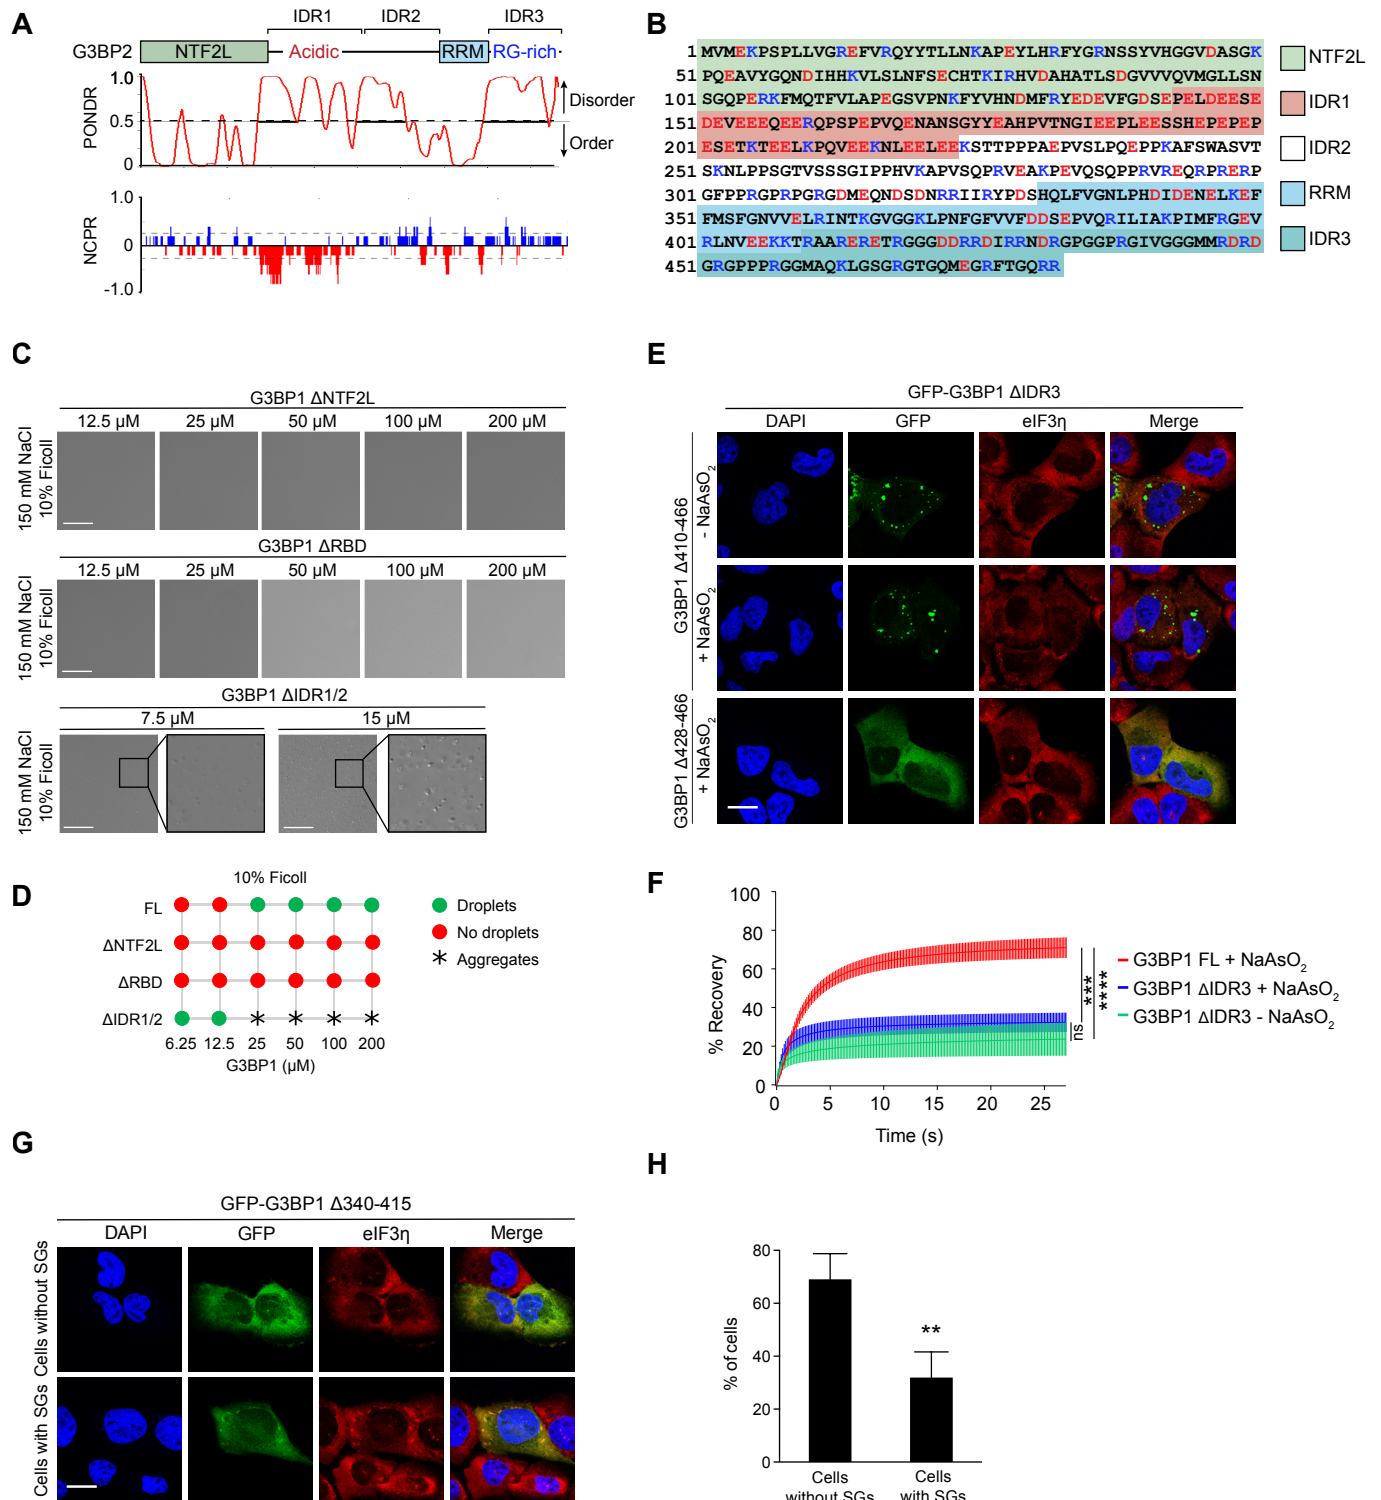

Supplement: NIHMS1611412-supplement-Taylor_figure_s3.pdf [file NIHMS1611412-supplement-Taylor_figure_s3.pdf]

# Figure S4

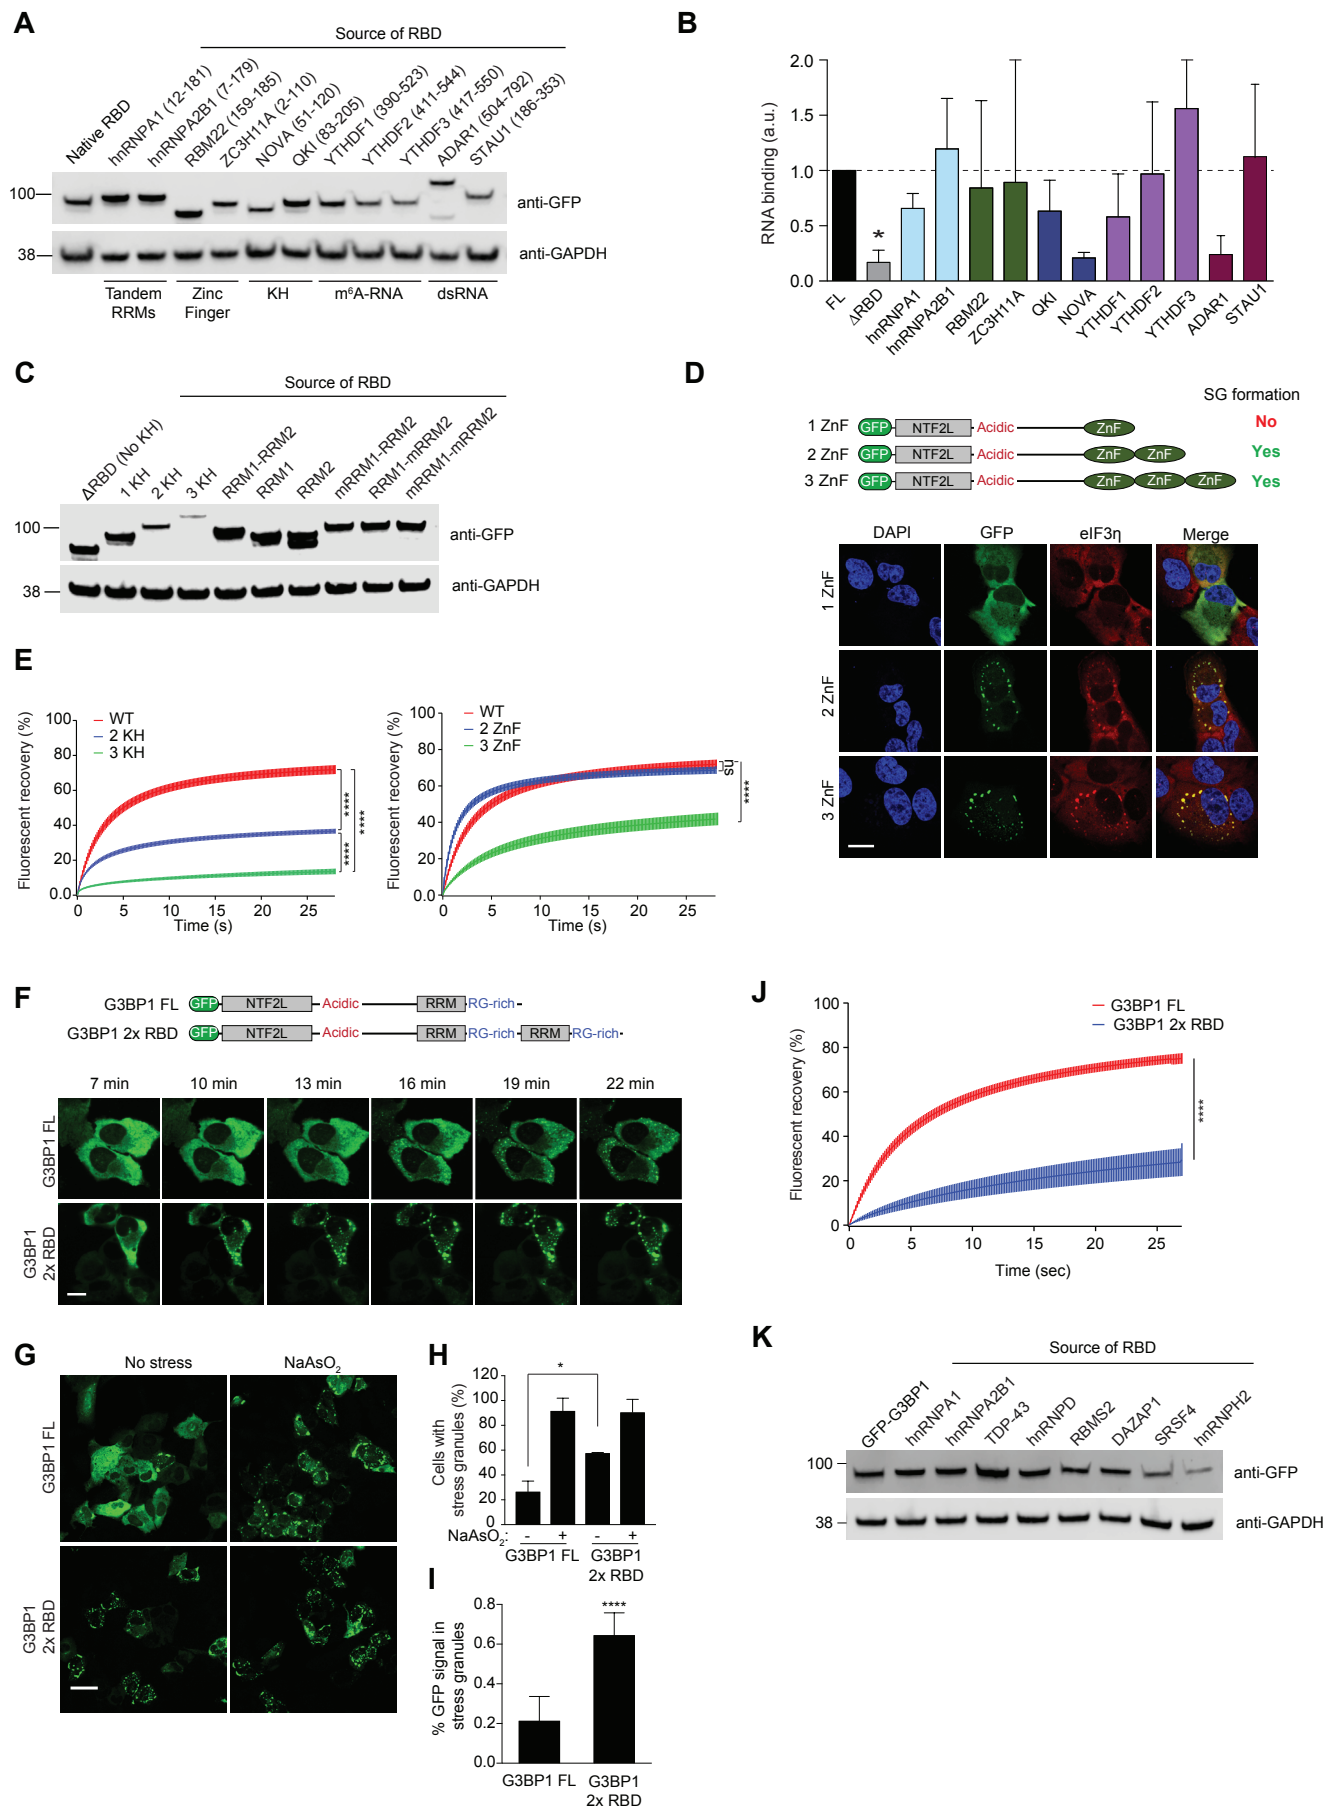

Supplement: NIHMS1611412-supplement-Taylor_figure_s4.pdf [file NIHMS1611412-supplement-Taylor_figure_s4.pdf]

# Figure S5

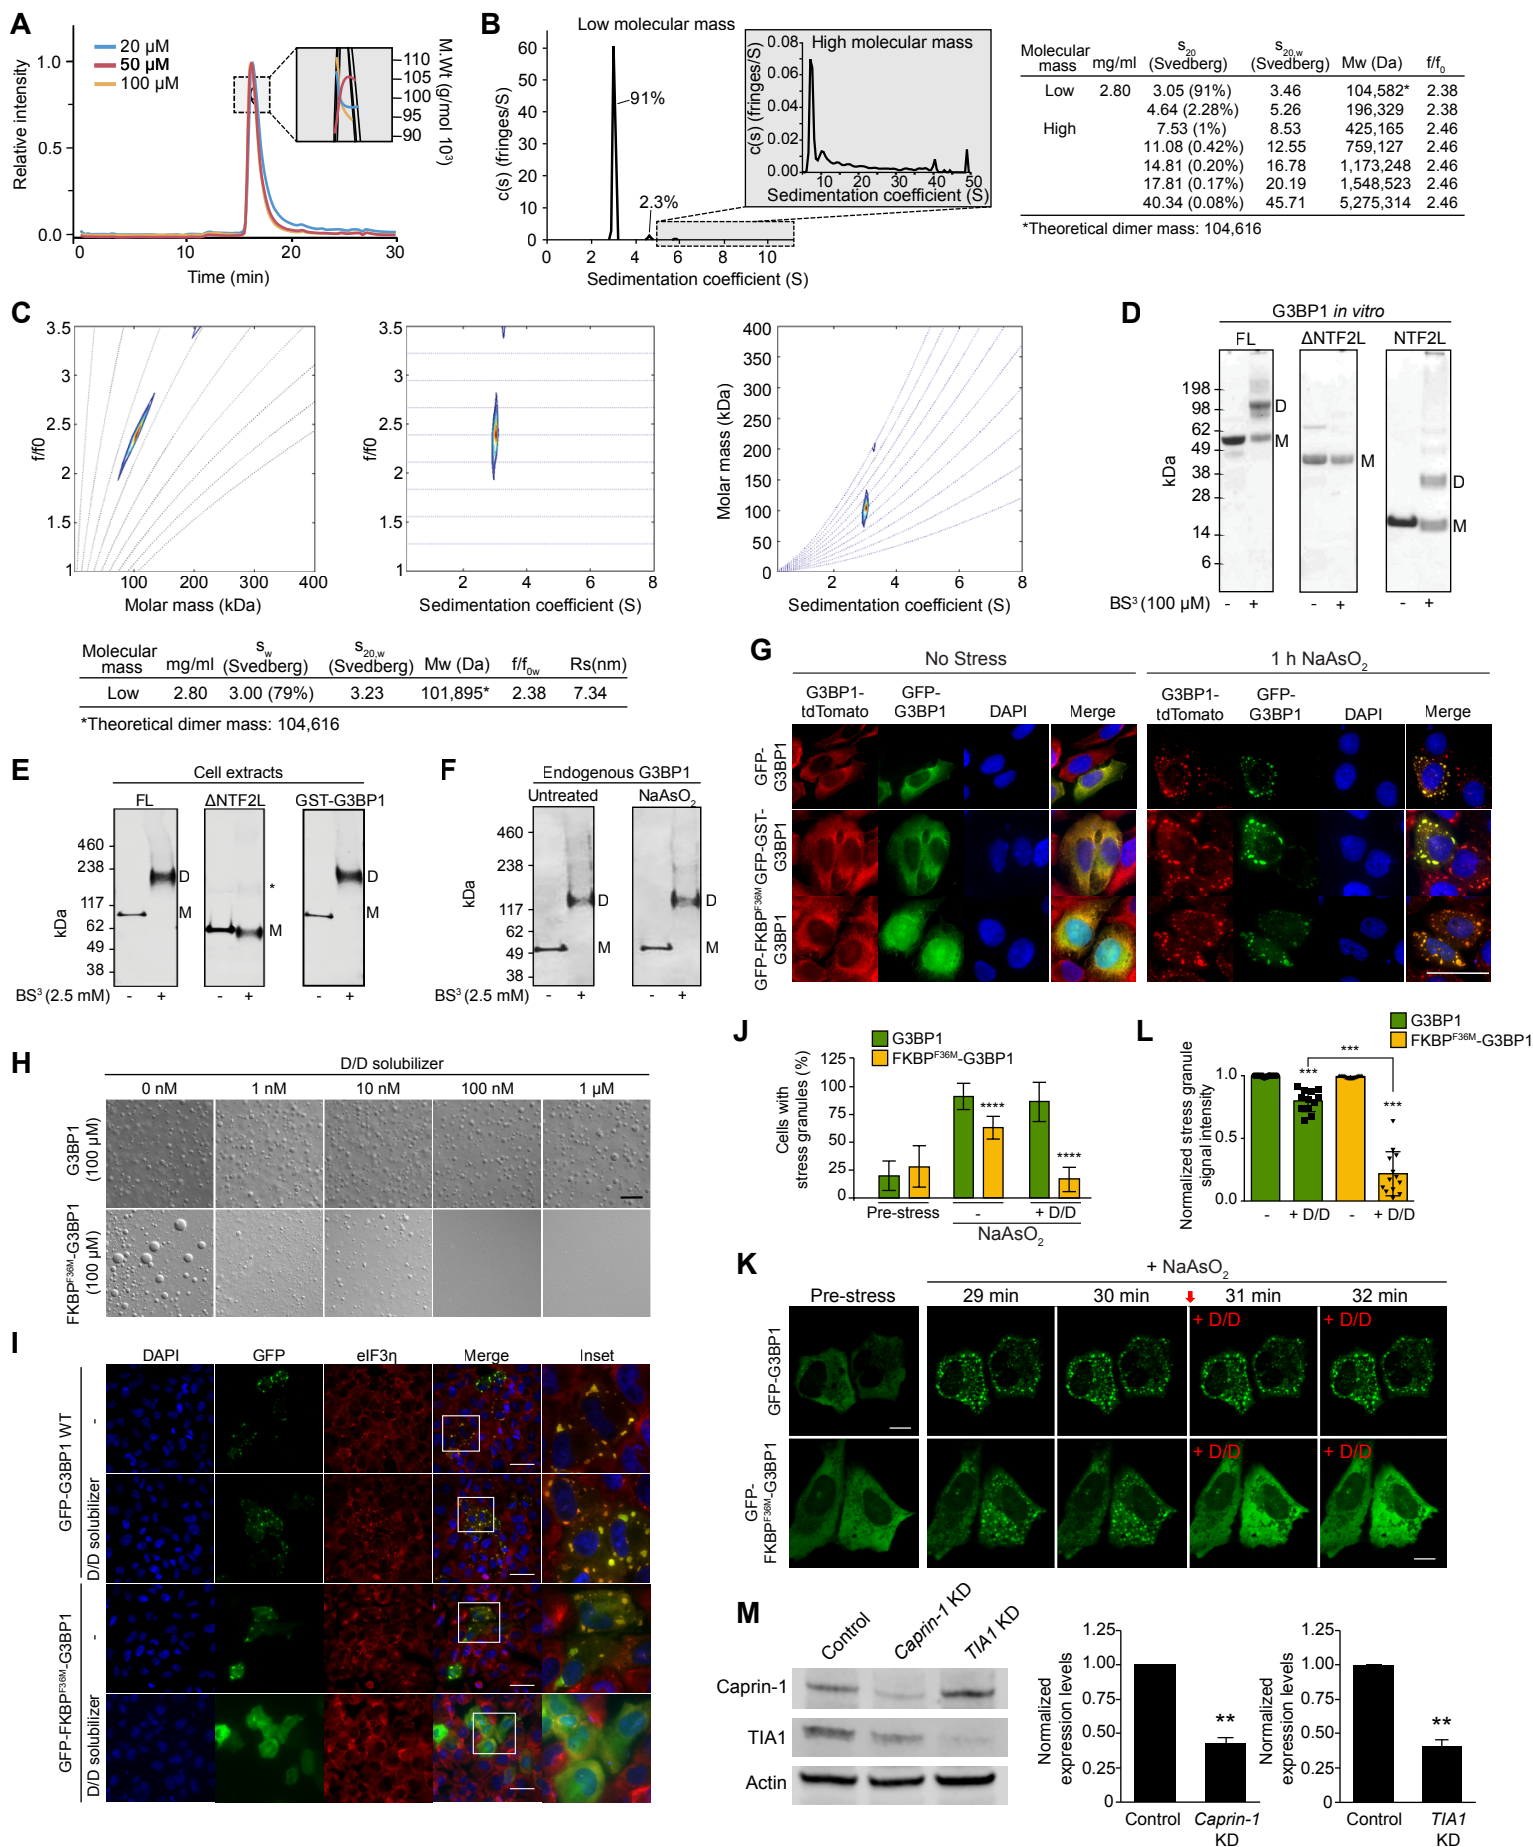

Supplement: NIHMS1611412-supplement-Taylor_figure_s5.pdf [file NIHMS1611412-supplement-Taylor_figure_s5.pdf]

# Figure S6

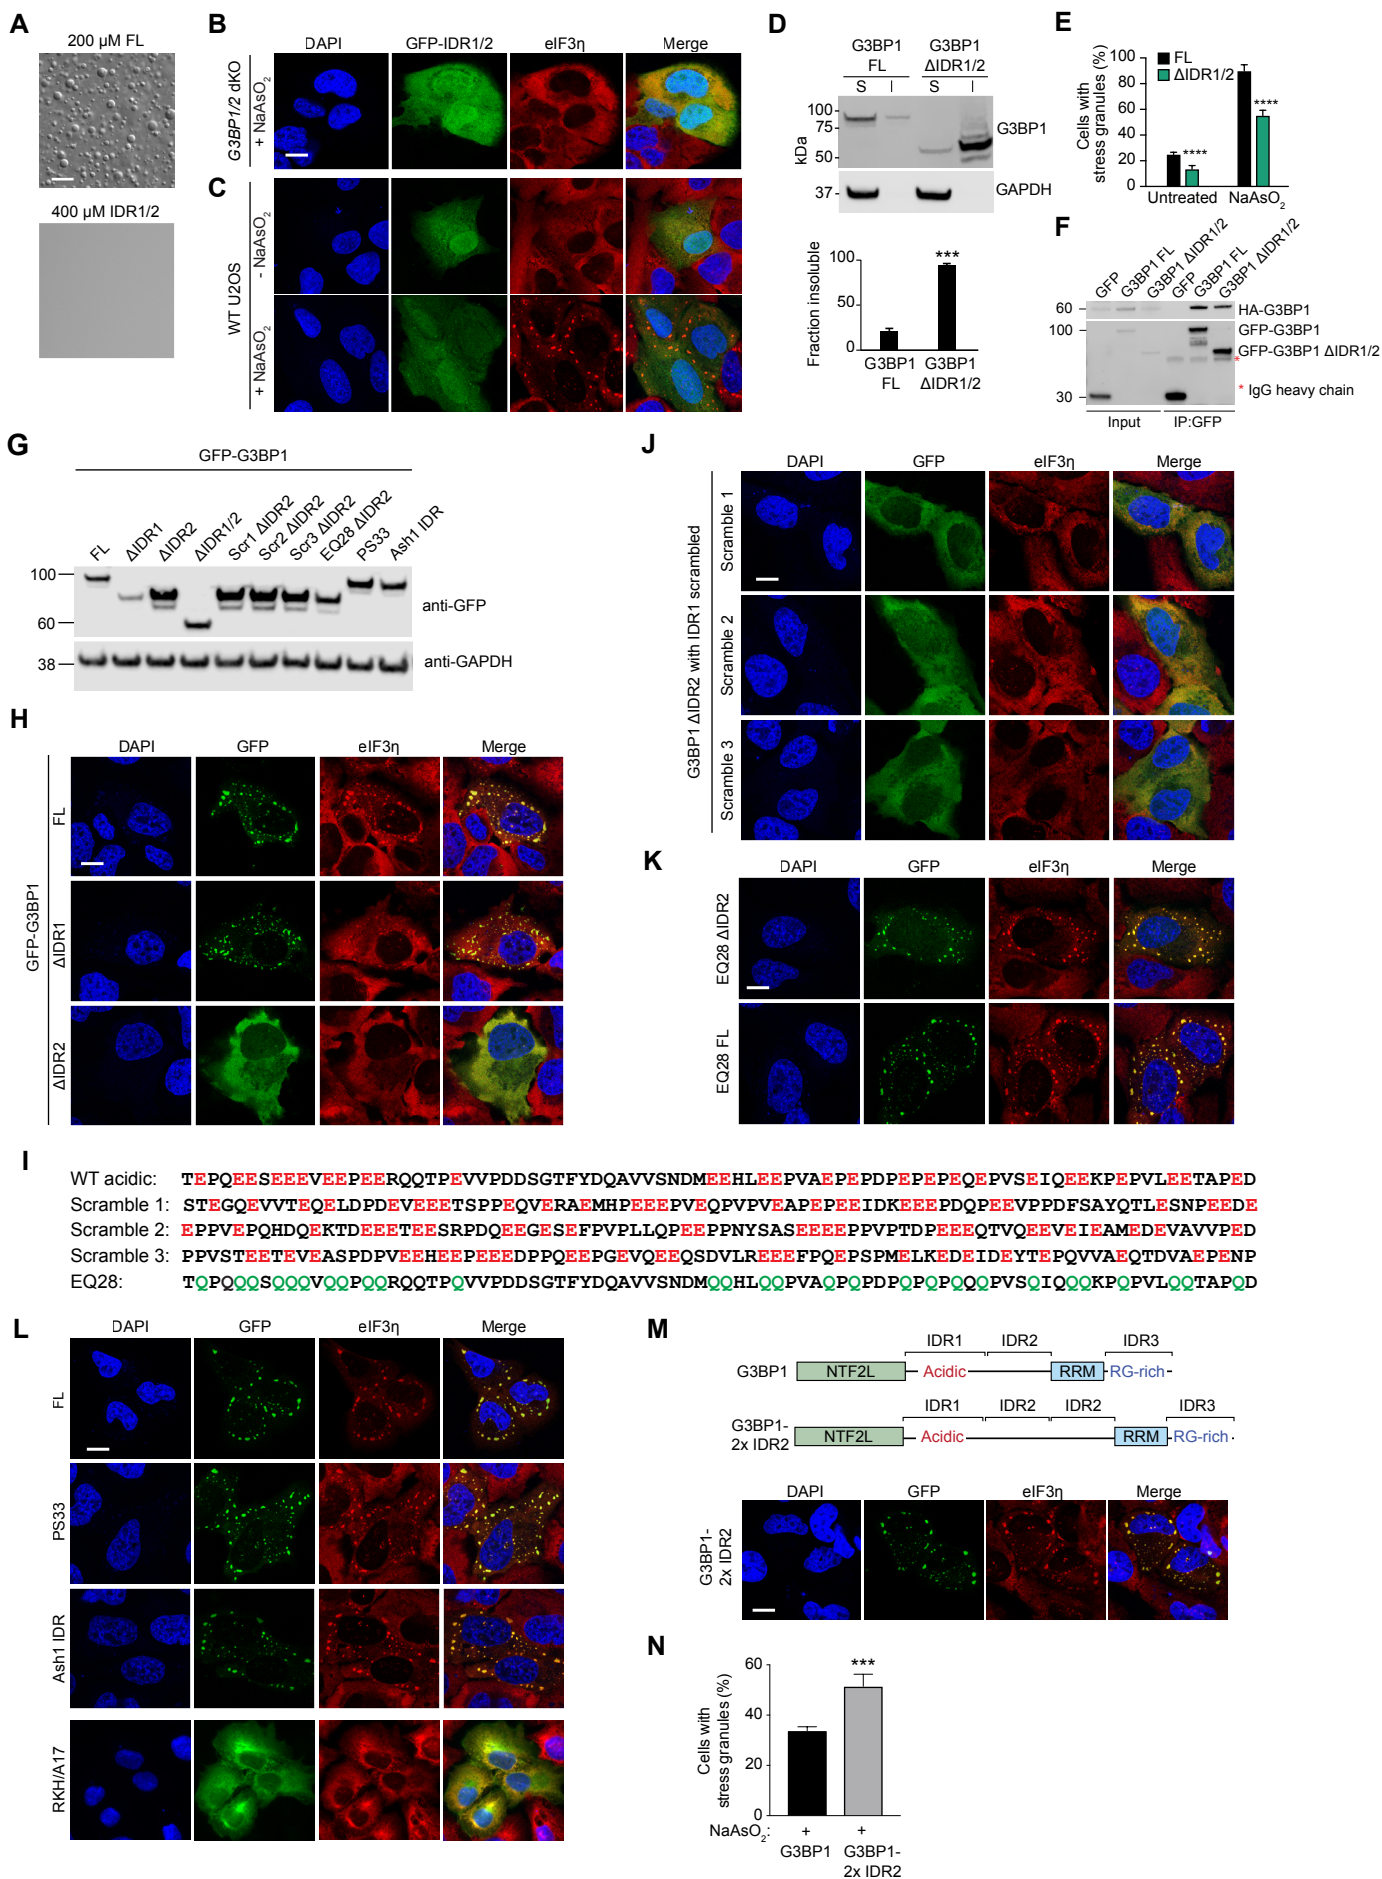

Supplement: NIHMS1611412-supplement-Taylor_figure_s6.pdf [file NIHMS1611412-supplement-Taylor_figure_s6.pdf]

# Figure S7

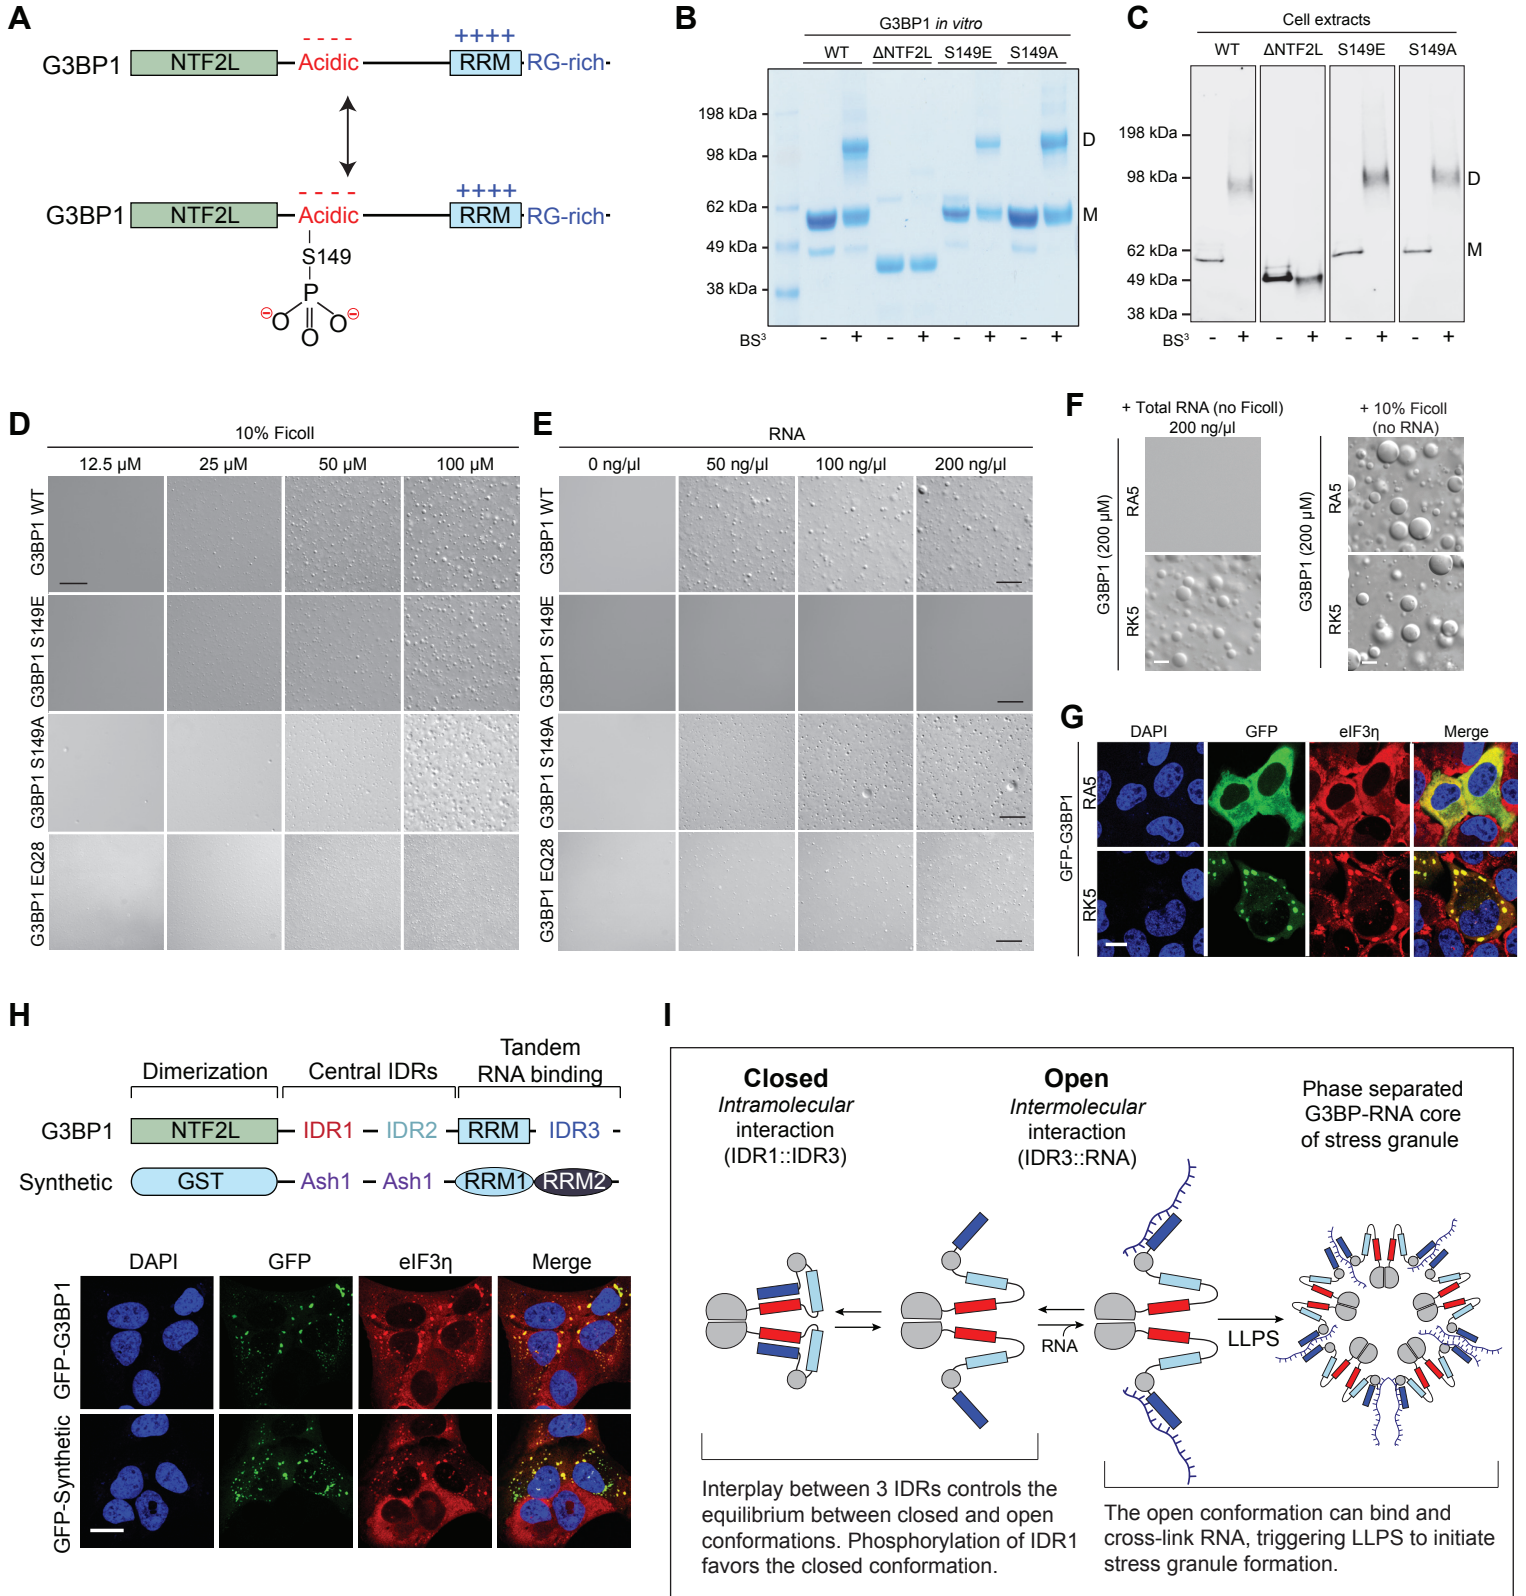

Supplement: NIHMS1611412-supplement-Taylor_figure_s7.pdf [file NIHMS1611412-supplement-Taylor_figure_s7.pdf]
